# Supplementary material for: The Antibiotic Treatment of Calf Diarrhea in Four European Countries: A Survey
Source: MDPI journal article supplement (doi:10.3390/antibiotics10080910), 2021-07-26
Supplement: s1 [file s1]

---

Article

# The Antibiotic Treatment of Calf Diarrhea in Four European Countries: A Survey

Cassandra Eibl <sup>1</sup>, Ricardo Bexiga <sup>2</sup>, Lorenzo Viora <sup>3</sup>, Hugues Guyot <sup>4</sup>, José Félix <sup>2</sup>, Johanna Wilms <sup>5</sup>,  
Alexander Tichy <sup>6</sup> and Alexandra Hund <sup>1,7,\*</sup>

- <sup>1</sup> University Clinic for Ruminants, Department for Farm Animals and Veterinary Public Health, University of Veterinary Medicine Vienna, 1210 Vienna, Austria; Cassandra.Eibl@vetmeduni.ac.at
- <sup>2</sup> Centro de Investigação Interdisciplinar em Sanidade Animal, Faculdade de Medicina Veterinária, Universidade de Lisboa, 1300-477 Lisbon, Portugal; ricardo-bexiga@fmv.ulisboa.pt (R.B.); jose\_duarte\_felix@hotmail.com (J.F.)
- <sup>3</sup> School of Veterinary Medicine, College of Medical, Veterinary and Life Sciences, University of Glasgow, G611GH Glasgow, UK; Lorenzo.Viora@glasgow.ac.uk
- <sup>4</sup> Clinical Department of Production Animals, Fundamental and Applied Research for Animals and Health, University of Veterinary Medicine, 1210 Vienna, Austria; Hugues.Guyot@uliege.be
- <sup>5</sup> Tierarztpraxis Geisenhausen, 84144 Geisenhausen, Germany; johanna.wilms@gmx.de
- <sup>6</sup> Platform Bioinformatics and Biostatistics, Department for Biomedical Sciences, University of Veterinary Medicine, 1210 Vienna, Austria; Alexander.Tichy@vet-meduni.ac.at
- <sup>7</sup> Agricultural Center for Cattle, Grassland, Dairy, Game and Fisheries of Baden-Württemberg (LAZBW), 88326 Aulendorf, Germany
- \* Correspondence: Alexandra.Hund@lazbw.bwl.de

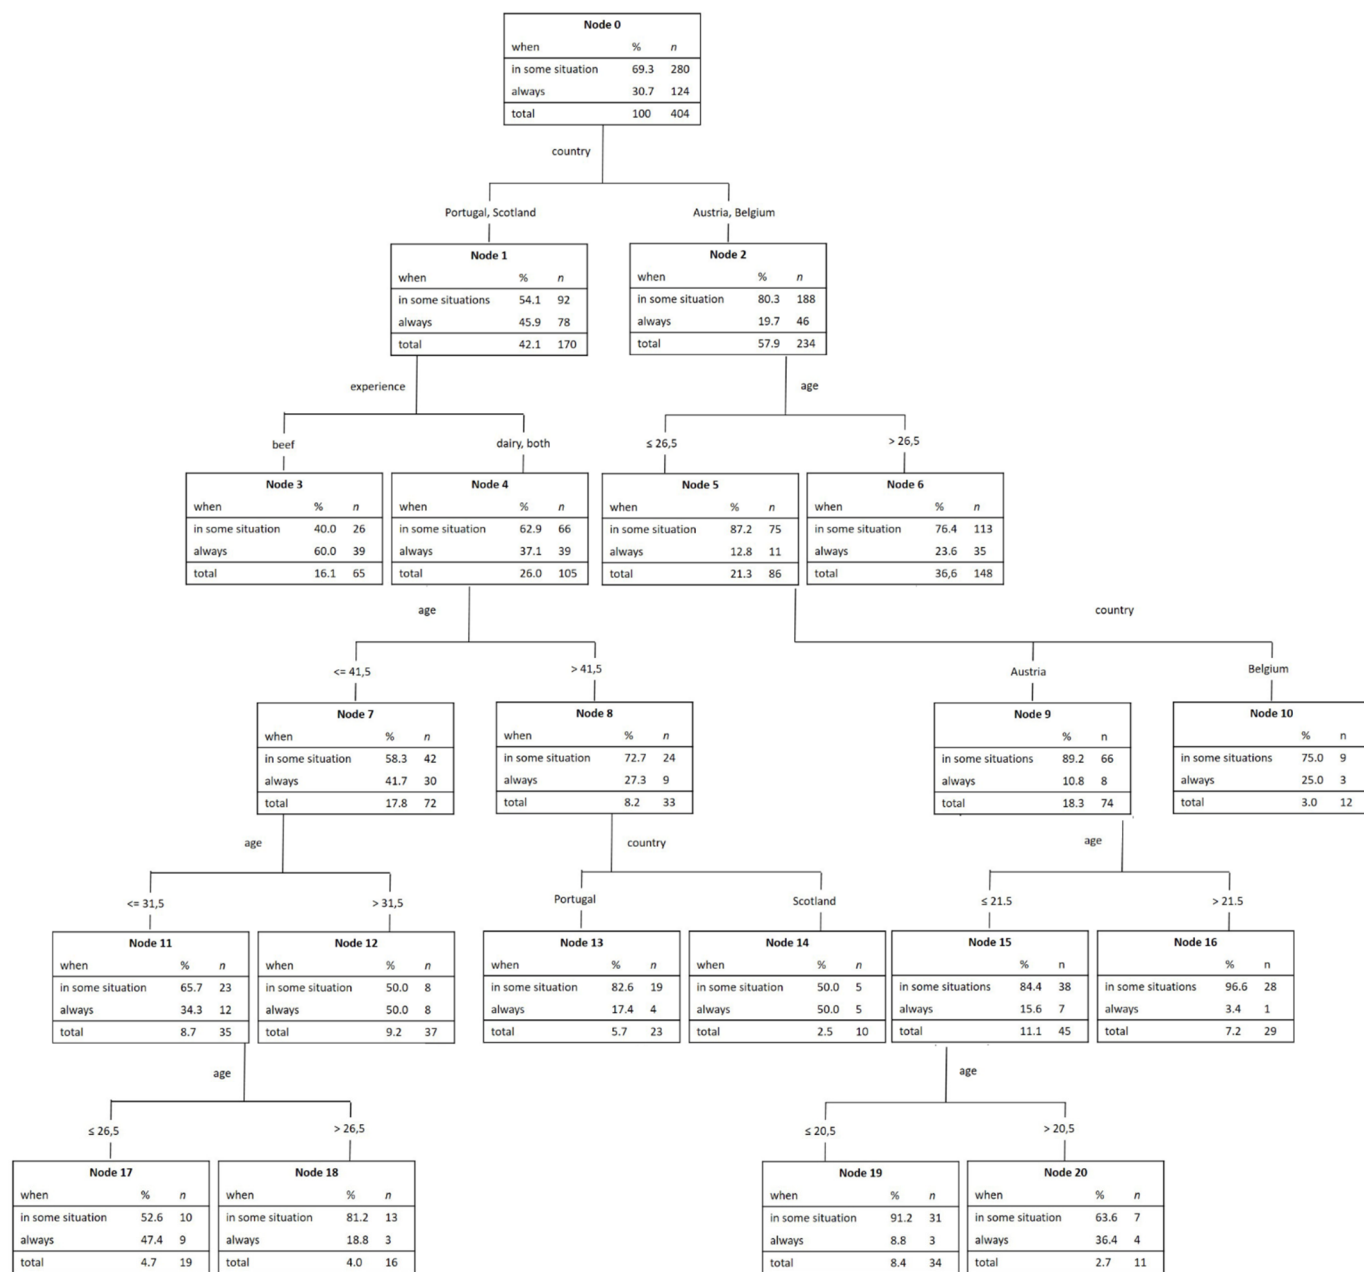

---

**Figure S1.** CART: Association of different factors on the use of antibiotics according to the question “If you usually use antimicrobials please state when”.
